# Supplementary material
Source: PubMed Central journal article supplement (PMC7480540)
Supplement: CJN.03550320SupplementaryData.pdf [file CJN.03550320SupplementaryData.pdf]

## Supplemental Item 1

We searched the PubMed database for studies published up to January 1<sup>st</sup> 2020 containing key words on 'PGT' and 'kidney disease', including a list of ~225 known renal disease causing genes (Supplementary Table 1). Studies were selected based on predefined in- and exclusion criteria, namely that they mentioned the presence of familial kidney disease or a known causative mutation leading to the performance of PGT. All studies were assessed by two independent observers and decisions were made based on consensus discussion.

All in all, a total of 14 studies detailing PGT for a known genetic kidney disease were identified, including syndromal conditions such as Fraser syndrome which were not included in our own cohort. These studies cover nine renal indications was performed, leading to 39 unaffected live births in 124 PGT cycles (31% success rate).

**Table 3 – Results of 14 studies on preimplantation genetic diagnostics for monogenic kidney disease**

| Study                                        | Country | Disease            | Gene(s)                                                           | Couples counselled (n) | Couples who undergo at least one PGT cycle (n) | PGT cycles (n) | Ongoing pregnancies (>12 weeks GA) (n)     | Live births from PGT (n) |
|----------------------------------------------|---------|--------------------|-------------------------------------------------------------------|------------------------|------------------------------------------------|----------------|--------------------------------------------|--------------------------|
| Berckmoes <i>et al.</i> , 2019 <sup>29</sup> | Belgium | ADPKD<br><br>ARPKD | <i>PKD1</i> (n=33)<br><i>PKD2</i> (n=2)<br><br><i>PKHD1</i> (n=9) | N=65                   | N=45                                           | N=91           | N=40 (of which<br>n=2 twin<br>pregnancies) | N=26                     |
| Murphy <i>et al.</i> , 2018 <sup>28</sup>    | USA     | ADPKD              | <i>PKD1</i> (n=7)                                                 | n=8                    | n=4                                            | n=2            | n=1                                        | n=1                      |

|                                      |         |                            |                   |             |             |                           |             |             |
|--------------------------------------|---------|----------------------------|-------------------|-------------|-------------|---------------------------|-------------|-------------|
|                                      |         |                            | <i>PKD2</i> (n=1) |             |             |                           |             |             |
| Li et al, 2017 <sup>30</sup>         | China   | ADPKD                      | <i>PKD1</i>       | n=1         | n=1         | n=1                       | n=1         | n=1         |
| Lu et al., 2013 <sup>27</sup>        | China   | Meckel-Gruber syndrome     | <i>TMEM67</i>     | n=1         | n=1         | n=1                       | n=1*        | n=1         |
| Altarescu et al., 2012 <sup>48</sup> | Israel  | Fabry disease              | <i>GLA</i>        | n=2         | n=2         | n=6                       | n=2         | n=2         |
| Ogur et al., 2011 <sup>26</sup>      | Poland  | Fraser syndrome            | <i>FRAS1</i>      | n=2         | n=2         | PGT is planned<br>for n=1 | N/A         | N/A         |
| Lau et al., 2010 <sup>25</sup>       | USA     | ARPKD                      | <i>PKHD1</i>      | n=1         | n=1         | n=1                       | n=1*        | n=1         |
| Obradors et al., 2009 <sup>24</sup>  | Spain   | Von Hippel-Lindau disease  | <i>VHL</i>        | n=1         | n=1         | n=1                       | n=1         | n=2         |
| Vanneste et al., 2009 <sup>23</sup>  | Belgium | Neurofibromatosis type 1   | <i>NF1</i> (n=2)  | n=3         | n=3         | n=5                       | n=0         | n=0         |
|                                      |         | Von Hippel-Lindau disease  | <i>VHL</i> (n=1)  |             |             | n=2                       | n=1         | n=2         |
| Altarescu et al., 2008 <sup>22</sup> | Israel  | Tuberous sclerosis complex | <i>TSC2</i>       | n=1         | n=1         | n=1                       | n=1*        | n=1         |
| Gigarel et al., 2008 <sup>49</sup>   | France  | ARPKD                      | <i>PKHD1</i>      | n=3         | n=3         | n=5                       | n=1         | n=1         |
| Renbaum et al., 2007 <sup>21</sup>   | Israel  | Allagile disease           | <i>JAG1</i>       | n=1         | n=1         | n=1                       | n=0         | n=0         |
| De Rycke et al., 2005 <sup>20</sup>  | Belgium | ADPKD                      | <i>PKD1</i>       | n=4         | n=4         | n=4                       | n=2         | n=2         |
| Rechitsky et al., 2002 <sup>19</sup> | USA     | Von Hippel-Lindau disease  | <i>VHL</i>        | n=1         | n=1         | n=3                       | n=0         | n=0         |
| <b>Total</b>                         |         |                            |                   | <b>n=93</b> | <b>n=70</b> | <b>n=124</b>              | <b>n=51</b> | <b>n=39</b> |

\* Two embryos transferred, case of vanishing twin.

ADPKD=autosomal dominant polycystic kidney disease, ARPKD=autosomal recessive polycystic kidney disease, PGT=preimplantation genetic diagnostics,

GA=gestational age, N/A=not applicable, NR=not reported, USA=United States of America
